# Supplementary material for: Breath-Synchronized Nebulized Surfactant in a Porcine Model of Acute Respiratory Distress Syndrome
Source: PubMed Central journal article supplement — Crit Care Explor. 2021 Feb 15;3(2):e0338. doi: 10.1097/CCE.0000000000000338 (PMC7886457; doi:10.1097/cce.0000000000000338), 2021-02-15
Supplement: cc9-3-e0338-s001.pdf [file cc9-3-e0338-s001.pdf]

Table S1. Lung injury score from individual animal

| Group      | Animal | Parameters |      |      |      |      |      |      | Total score     |
|------------|--------|------------|------|------|------|------|------|------|-----------------|
|            |        | A          | B    | C    | D    | E    | F    | G    |                 |
| Control    | #1     | 1          | 1    | 1    | 0    | 1    | 1    | 1    | 6               |
|            | #2     | 2          | 2    | 1    | 2    | 3    | 2    | 1    | 13              |
|            | #3     | 3          | 3    | 2    | 1    | 1    | 1    | 2    | 13              |
| Surfactant | #1     | 0          | 0    | 0    | 1    | 0    | 0    | 0    | 1               |
|            | #2     | 0          | 1    | 1    | 1    | 1    | 1    | 0    | 5               |
|            | #3     | 1          | 2    | 1    | 1    | 1    | 1    | 1    | 8               |
|            | #4     | 2          | 2    | 0    | 1    | 0    | 1    | 1    | 7               |
| p          |        | 0.08       | 0.18 | 0.06 | 0.50 | 0.07 | 0.11 | 0.06 | <b>&lt;0.05</b> |

Table S2. Cytokine data (Plasma)

|        | Post-Lavage  |              | P value<br>(Control vs<br>Surfactant) | END           |              | P value<br>(Control vs<br>Surfactant) | P value<br>(Post-Lavage vs END) |             |
|--------|--------------|--------------|---------------------------------------|---------------|--------------|---------------------------------------|---------------------------------|-------------|
|        | Control      | Surfactant   |                                       | Control       | Surfactant   |                                       | Control                         | Surfactant  |
| GM-CSF | -0.20 ± 0.09 | 0.08 ± 0.13  | 0.84                                  | 0.95 ± 0.83   | -0.27 ± 0.12 | 0.08                                  | 0.13                            | 0.73        |
| IFN-γ  | 0.14 ± 0.28  | 0.80 ± 0.25  | 0.40                                  | 1.75 ± 0.70   | 0.14 ± 0.17  | <b>0.02</b>                           | <b>0.03</b>                     | 0.35        |
| IL-1α  | -0.06 ± 0.04 | 0.03 ± 0.03  | 0.67                                  | -0.10 ± 0.16  | -0.06 ± 0.04 | 0.95                                  | 0.94                            | 0.61        |
| IL-1β  | 0.21 ± 0.22  | 0.18 ± 0.11  | >0.99                                 | 0.61 ± 0.52   | 0.05 ± 0.02  | 0.25                                  | 0.52                            | 0.90        |
| IL-1ra | 4.02 ± 2.20  | 14.26 ± 4.05 | 0.65                                  | 54.80 ± 17.86 | 9.92 ± 4.59  | 0.01                                  | <b>0.005</b>                    | 0.91        |
| IL-2   | -0.01 ± 0.03 | 0.04 ± 0.04  | 0.91                                  | 0.02 ± 0.19   | -0.08 ± 0.06 | 0.73                                  | 0.97                            | 0.58        |
| IL-4   | 0.002 ± 0.07 | 0.12 ± 0.05  | 0.59                                  | -0.21 ± 0.13  | -0.11 ± 0.09 | 0.68                                  | 0.25                            | 0.13        |
| IL-6   | 0.56 ± 0.28  | 0.10 ± 0.04  | 0.44                                  | 1.70 ± 0.55   | 0.005 ± 0.06 | <b>0.002</b>                          | <b>0.03</b>                     | 0.95        |
| IL-8   | -0.06 ± 0.05 | 0.02 ± 0.13  | 0.90                                  | 0.32 ± 0.14   | -0.12 ± 0.16 | 0.09                                  | 0.18                            | 0.70        |
| IL-10  | 0.14 ± 0.17  | 0.03 ± 0.04  | 0.73                                  | -0.17 ± 0.15  | -0.07 ± 0.06 | 0.79                                  | 0.16                            | 0.71        |
| IL-12  | -0.06 ± 0.03 | 0.06 ± 0.03  | 0.52                                  | 0.11 ± 0.17   | -0.02 ± 0.04 | 0.44                                  | 0.32                            | 0.69        |
| IL-18  | 0.01 ± 0.02  | 0.09 ± 0.06  | 0.78                                  | -0.08 ± 0.16  | -0.22 ± 0.07 | 0.49                                  | 0.73                            | <b>0.04</b> |
| TNF-α  | -0.06 ± 0.13 | 0.43 ± 0.46  | 0.61                                  | 0.29 ± 0.46   | -0.03 ± 0.27 | 0.80                                  | 0.80                            | 0.60        |

GM-CSF, Granulocyte-macrophage colony-stimulating factor; IFN-γ, Interferon-gamma; IL, Interleukin; IL-1ra, IL-1 receptor antagonist; TNF-α, Tumor necrosis factor-alpha. Data is standardized by pre-lavage data. Data is mean ± SEM

Table S3. Cytokine data (Lung tissue)

| (pg/mg lung protein) | Control     | Surfactant  | p     |
|----------------------|-------------|-------------|-------|
| GM-CSF               | 11.2 ± 5.5  | 9.7 ± 3.8   | 0.41  |
| IFN-γ                | 68.7 ± 30.2 | 36.5 ± 30.8 | 0.25  |
| IL-1α                | 48.0 ± 24.7 | 14.0 ± 3.6  | 0.08  |
| IL-1β                | 2704 ± 1558 | 827 ± 279   | 0.11  |
| IL-1ra               | 1689 ± 644  | 971 ± 510   | 0.21  |
| IL-2                 | 1.9 ± 0.4   | 1.6 ± 0.4   | 0.29  |
| IL-4                 | 2.5 ± 0.5   | 1.8 ± 0.1   | 0.08  |
| IL-6                 | 84.8 ± 76.4 | 27.1 ± 9.6  | 0.21  |
| IL-8                 | 511 ± 340   | 130 ± 33    | 0.12  |
| IL-10                | 2.1 ± 0.5   | 1.2 ± 0.1   | 0.052 |
| IL-12                | 46.1 ± 15.4 | 27.1 ± 8.6  | 0.15  |
| IL-18                | 524 ± 150   | 534 ± 76    | 0.48  |
| TNF-α                | 4.4 ± 4.4   | 0.9 ± 0.9   | 0.20  |

GM-CSF, Granulocyte-macrophage colony-stimulating factor; IFN-γ, Interferon-gamma; IL, Interleukin; IL-1ra, IL-1 receptor antagonist; TNF-α, Tumor necrosis factor-alpha. Data is mean ± SEM.

Table S4. Cytokine data (Bronchoalveolar lavage fluid)

| (pg/mL)                  | Control        | Surfactant    | p            |
|--------------------------|----------------|---------------|--------------|
| GM-CSF                   | 111.3 ± 36.3   | 83.6 ± 5.7    | 0.21         |
| IFN-γ                    | 686.1 ± 308.0  | 358.5 ± 118.2 | 0.16         |
| IL-1α                    | 1249.0 ± 753.6 | 97.2 ± 42.6   | 0.06         |
| IL-1β                    | 36192 ± 10172  | 10064 ± 4642  | <b>0.03</b>  |
| IL-1ra                   | 10240 ± 7034   | 2959 ± 1045   | 0.14         |
| IL-2                     | 39.9 ± 11.4    | 28.7 ± 6.8    | 0.21         |
| IL-4                     | 10.3 ± 0.7     | 8.1 ± 1.1     | 0.10         |
| IL-6                     | 677.4 ± 423.2  | 517.3 ± 174.9 | 0.36         |
| IL-8                     | 13471 ± 8063   | 3143 ± 1330   | 0.10         |
| IL-10                    | 38.0 ± 25.4    | 8.6 ± 2.5     | 0.12         |
| IL-12                    | 378.9 ± 27.7   | 123.5 ± 44.3  | <b>0.003</b> |
| IL-18                    | 1804 ± 1029    | 512 ± 135     | 0.10         |
| TNF-α                    | 0.103 ± 0.023  | 0.048 ± 0.005 | <b>0.02</b>  |
| IL-1α / IL-1ra           | 0.140 ± 0.016  | 0.040 ± 0.011 | <b>0.001</b> |
| IL-1β / IL-1ra           | 6.3 ± 2.2      | 3.1 ± 0.4     | 0.08         |
| Divided by total protein |                |               |              |
| (pg/mg)                  |                |               |              |
| GM-CSF                   | 106.3 ± 40.1   | 192.3 ± 73.3  | 0.20         |
| IFN-γ                    | 639.4 ± 287.0  | 730.1 ± 358.9 | 0.43         |
| IL-1α                    | 959.1 ± 354.9  | 147.8 ± 53.3  | <b>0.02</b>  |
| IL-1β                    | 42647 ± 25005  | 14349 ± 6008  | 0.13         |
| IL-1ra                   | 6789 ± 2193    | 5307 ± 2903   | 0.36         |
| IL-2                     | 62.1 ± 46.3    | 82.5 ± 40.1   | 0.38         |
| IL-4                     | 12.9 ± 7.1     | 17.8 ± 6.5    | 0.32         |
| IL-6                     | 411.8 ± 64.6   | 898.4 ± 319.4 | 0.13         |
| IL-8                     | 8796 ± 1333    | 6104 ± 3398   | 0.27         |
| IL-10                    | 22.6 ± 4.9     | 14.2 ± 2.9    | 0.09         |
| IL-12                    | 469.6 ± 253.2  | 199.8 ± 81.8  | 0.15         |
| IL-18                    | 1434.8 ± 535.1 | 922.9 ± 259.1 | 0.19         |
| TNF-α                    | 0.13 ± 0.08    | 0.10 ± 0.04   | 0.39         |

GM-CSF, Granulocyte-macrophage colony-stimulating factor; IL, Interleukin; IL-1ra, IL-1 receptor antagonist; IFN-γ, Interferon-gamma; TNF-α, Tumor necrosis factor-alpha. Data is mean ± SEM
