# Supplementary material for: Breath-Synchronized Nebulized Surfactant in a Porcine Model of Acute Respiratory Distress Syndrome
Source: PubMed Central journal article supplement — Crit Care Explor. 2021 Feb 15;3(2):e0338. doi: 10.1097/CCE.0000000000000338 (PMC7886457; doi:10.1097/cce.0000000000000338), 2021-02-15
Supplement: cc9-3-e0338-s003.pdf [file cc9-3-e0338-s003.pdf]

Experimental Set-up: Delivered Lung Dose

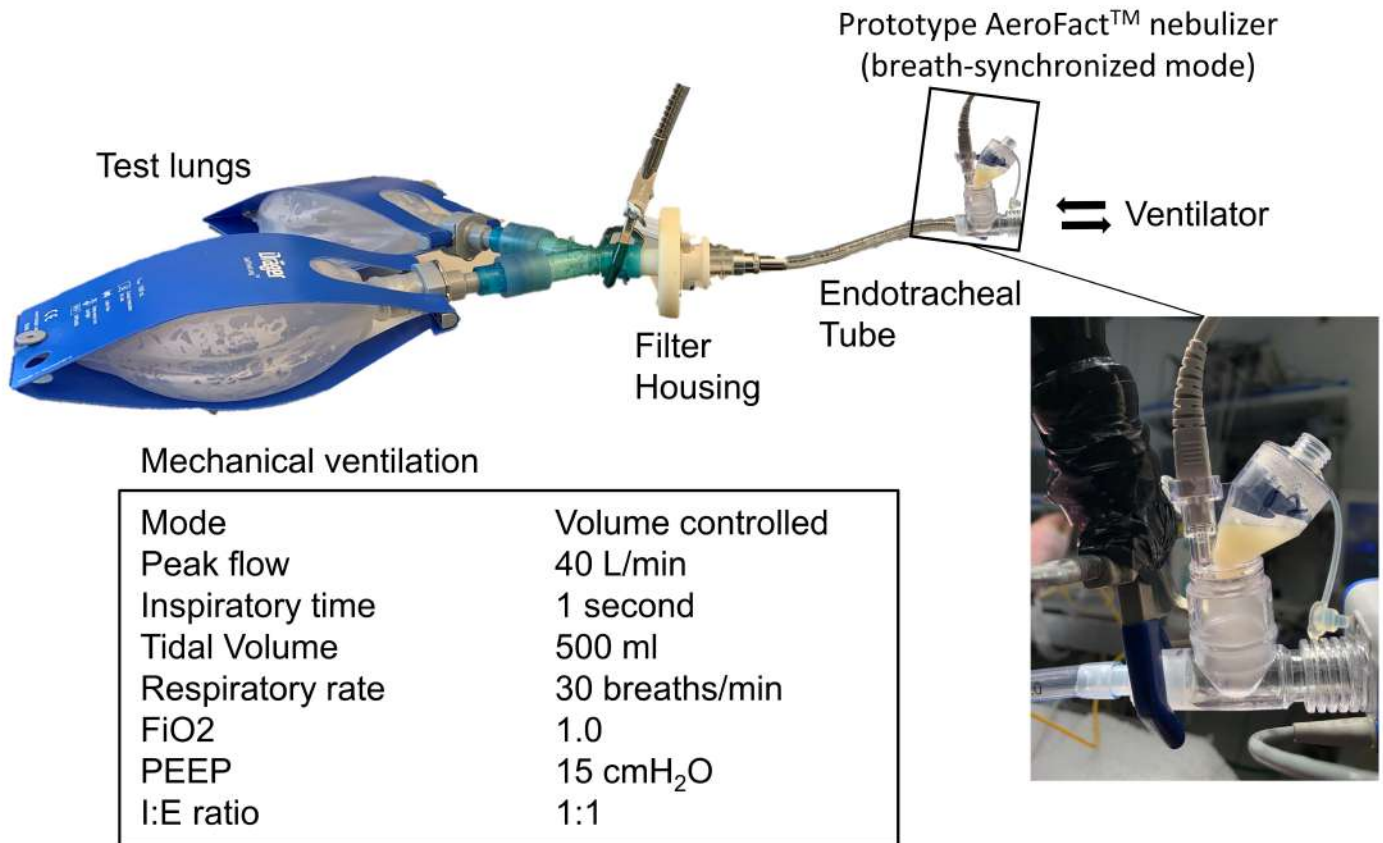

**Figure S1.** Experimental set-up for delivered lung dose study. Surfactant delivered dose was determined by measuring the collected amount of breath-synchronized nebulized surfactant on a filter during simulated mechanical ventilation.

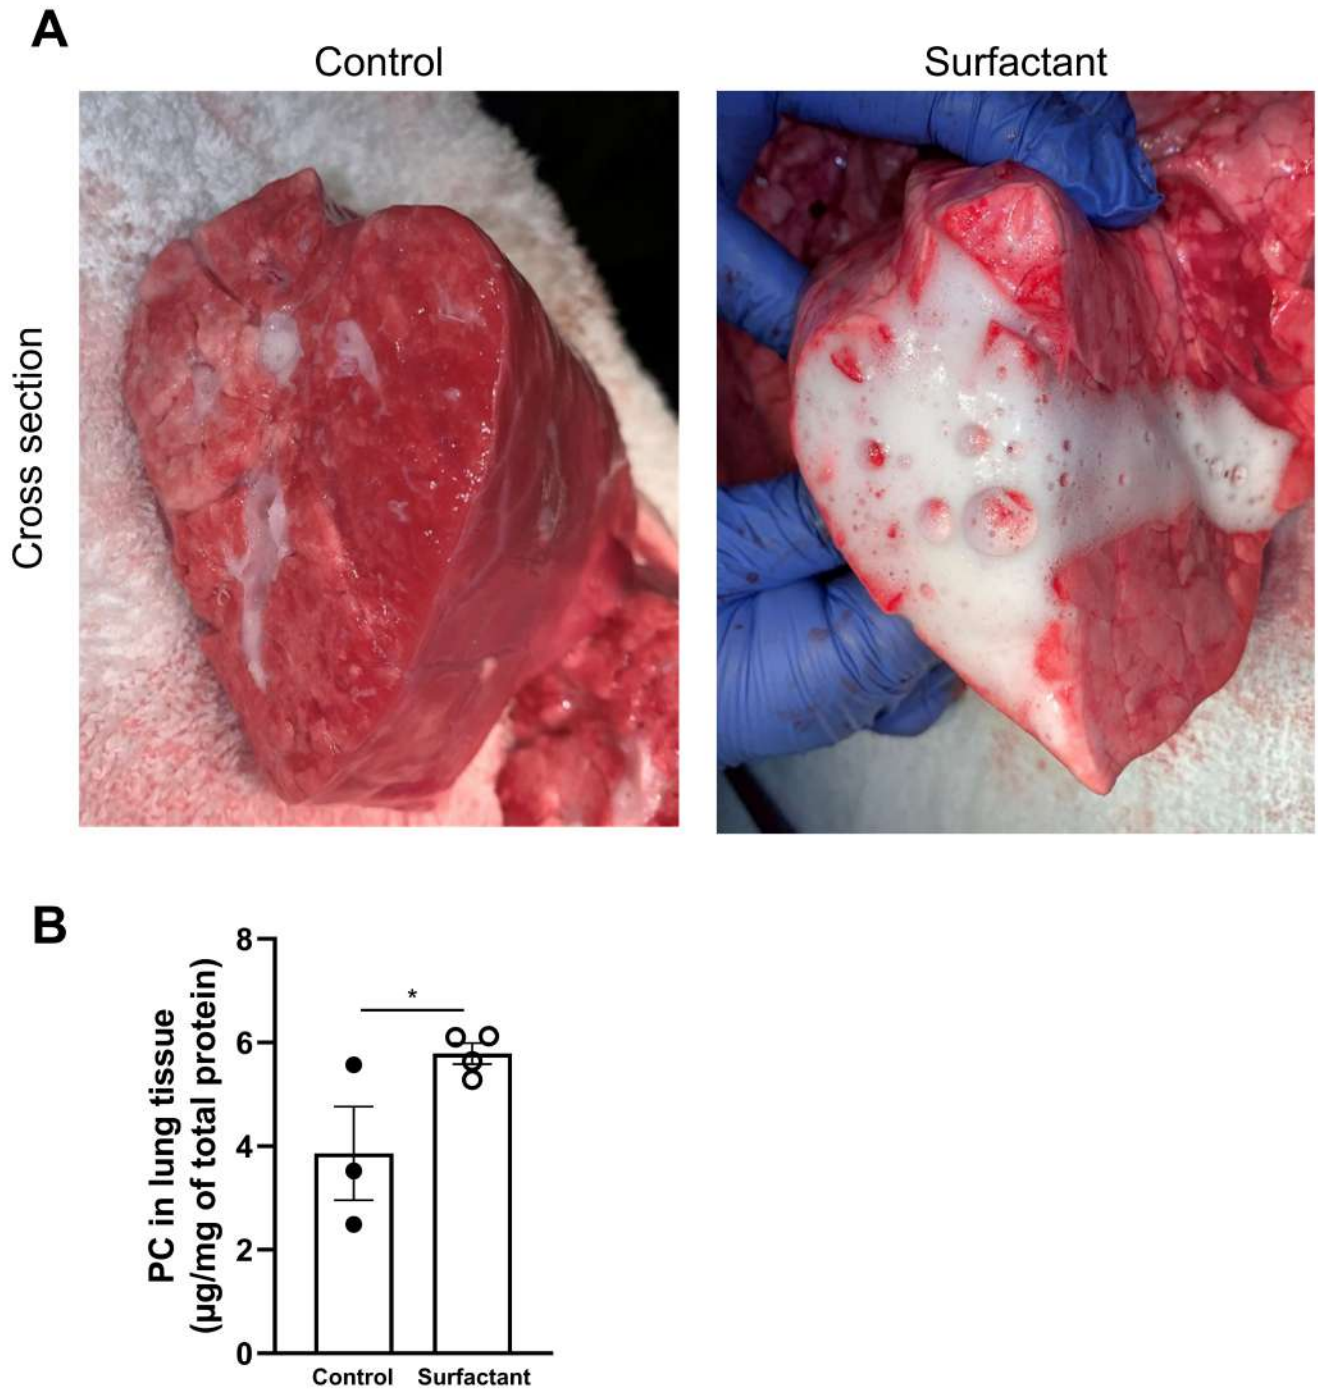

**Figure S2.** Macroscopic appearance of excised porcine lungs. Abundant foamy liquid is assumed to be surfactant overflow from the cut surface of lung lobe in Surfactant-treated animals that was absent in Controls (A).

Phosphatidylcholine (PC) level from lung homogenate showed greater repletion in Surfactant-treated animals than Control animals (B). Values are means  $\pm$  SEM. \*,  $p < 0.05$ ; \*\*,  $p < 0.01$  compared between 2 groups. #,  $p < 0.05$  compared with 0 (at the start of the treatment) within groups.

Figure S3

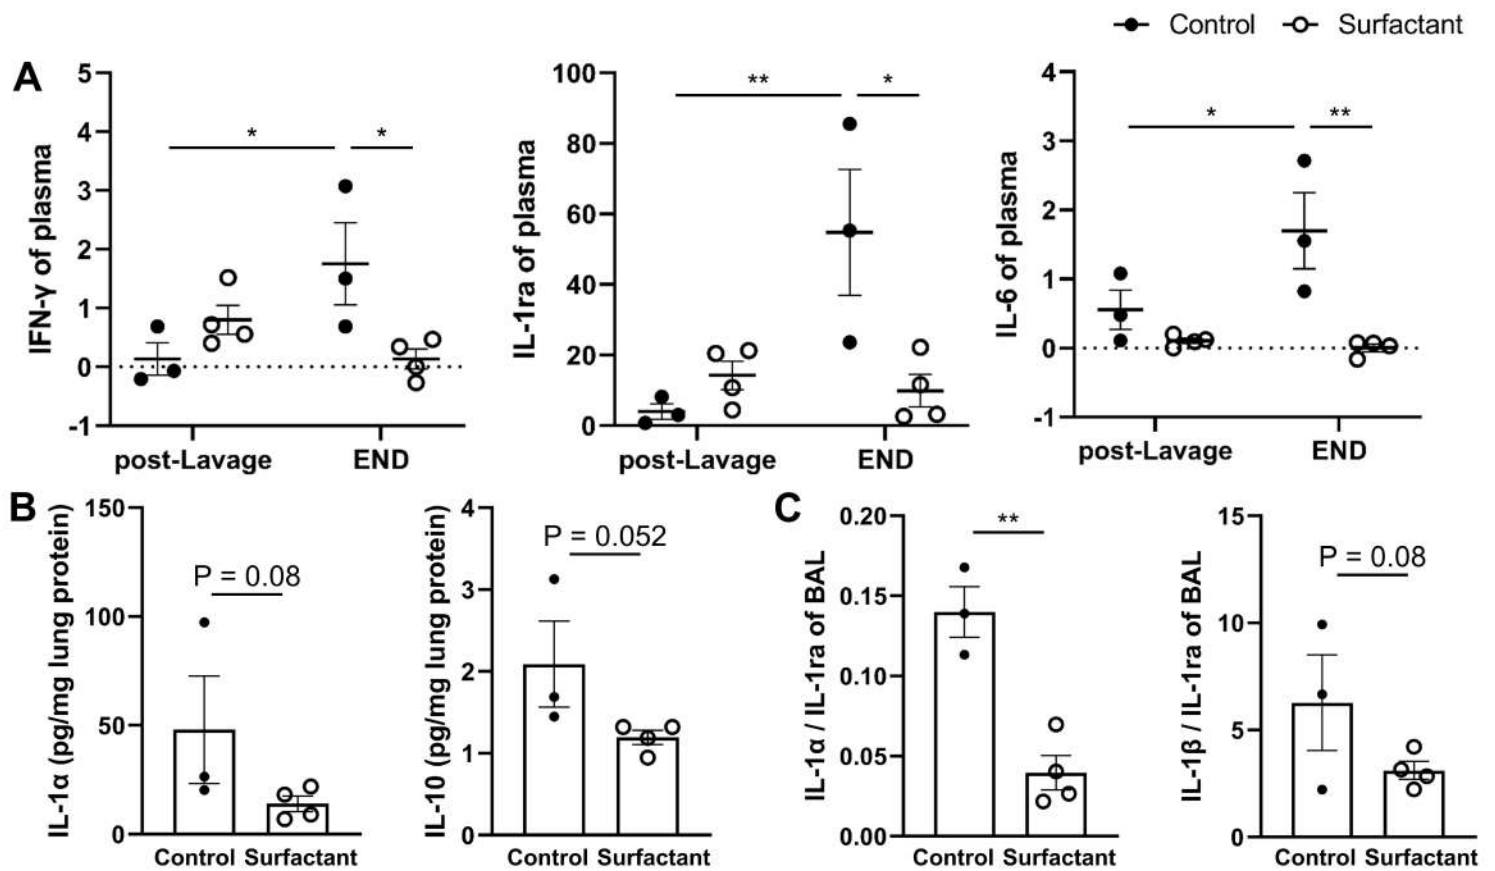

**Figure S3.** Cytokine levels in plasma (A), lung (B), and BALF (C). Plasma cytokine levels were not different at post-lavage before treatment. Several parameters including IFN- $\gamma$ , IL-1ra and IL-6 were significantly increased in control pigs at the endpoint of protocol (4.5 hours after the start of treatment), while they were maintained within baseline level in surfactant-treated pigs. The differences of cytokine levels in lung tissue and BALF were smaller than plasma, but they were maintained at low level in surfactant-treated pigs as well as in plasma. BALF, bronchoalveolar lavage fluid; IFN- $\gamma$ , interferon-gamma; IL-1ra, interleukin-1 receptor antagonist. Values are means  $\pm$  SEM. \*,  $p < 0.05$ ; \*\*,  $p < 0.01$ .
